# Supplementary material for: A Novel Five-Gene Signature for Prognosis Prediction in Hepatocellular Carcinoma
Source: PubMed Central journal article supplement (PMC8322700; doi:10.3389/fonc.2021.642563), 2021-07-16
Supplement: Table_1.pdf [file Table_1.pdf]

Table. S1 The sequences of the qRT-PCR primers used in this study

| Gene           | Forward primer         | Reverse primer         |
|----------------|------------------------|------------------------|
| AURKA          | GAGGTCCAAAACGTGTTCTCG  | ACAGGATGAGGTACACTGGTTG |
| PZP            | CACAGGAAACCGTCCTGCTT   | ACTCAGCAACCACAGACTCAT  |
| RACGAP1        | TCCAATTTATCCAGTTGGCGAA | CTTCAGCTTAACATCCAGAGCA |
| ACOT12         | GAGGAAGGAGCGGTTTCCAC   | AGGCGGCTTGCAGAAATAGTA  |
| LCAT           | ACCTGGTCAACAATGGCTACG  | TAGAGCAAGTGTAGACAGCCG  |
| $\beta$ -ACTIN | CGTGGGCCCGCCCTAGGCACCA | TTGGCTTAGGGTTCAGGGGGG  |

Table S2 Clinical characteristics of HCC patients involved in the study

|                             |                 | TCGA cohort<br>(N=365) | ICGC cohort<br>(N=227) | Independent cohort<br>(N=59) |
|-----------------------------|-----------------|------------------------|------------------------|------------------------------|
| Gender                      | Male            | 119                    | 61                     | 45                           |
|                             | Female          | 246                    | 166                    | 14                           |
| Age                         | $\leq 60$ years | 173                    | 49                     | 27                           |
|                             | $>60$ years     | 192                    | 178                    | 32                           |
| Grade                       | G1/2            | 230                    |                        | 35                           |
|                             | G3/4            | 130                    |                        | 24                           |
|                             | unknown         | 5                      |                        |                              |
| TNM Stage                   | I/II            | 254                    | 140                    | 42                           |
|                             | III/IV          | 87                     | 87                     | 17                           |
|                             | unknown         | 24                     | 0                      | 0                            |
| Vascular Invasion           | Yes             | 106                    |                        |                              |
|                             | No              | 205                    |                        |                              |
|                             | unknown         | 5                      |                        |                              |
| Recurrence                  | With tumor      | 122                    |                        | 29                           |
|                             | Tumor free      | 161                    |                        | 30                           |
|                             | unknown         | 82                     |                        | 0                            |
| Cirrhosis                   | With            | 68                     |                        | 6                            |
|                             | Without         | 141                    |                        | 53                           |
|                             | unknown         | 156                    |                        | 0                            |
| <b>HBV or HCV Infection</b> |                 |                        |                        |                              |
|                             | Yes             | 149                    |                        | 41                           |
|                             | No              | 203                    |                        | 18                           |
|                             | unknown         | 13                     |                        | 0                            |
| Child-Pugh                  | A               | 216                    |                        | 57                           |
|                             | B               | 21                     |                        | 2                            |
|                             | C               | 1                      |                        | 0                            |

|                |     |   |
|----------------|-----|---|
| <b>unknown</b> | 127 | 0 |
|----------------|-----|---|

Table. S3 The results of collinearity statistics

|                | <b>Tolerance</b> | <b>Variance Inflation Factor (VIF)</b> |
|----------------|------------------|----------------------------------------|
| <b>AURKA</b>   | 0.439            | 2.280                                  |
| <b>PZP</b>     | 0.901            | 1.110                                  |
| <b>RACGAP1</b> | 0.415            | 2.412                                  |
| <b>ACOT12</b>  | 0.839            | 1.192                                  |
| <b>LCAT</b>    | 0.795            | 1.258                                  |
